# Supplementary material for: Analysis of Structural Variants Reveal Novel Selective Regions in the Genome of Meishan Pigs by Whole Genome Sequencing
Source: Front Genet. 2021 Feb 4;12:550676. doi: 10.3389/fgene.2021.550676 (PMC7890942; doi:10.3389/fgene.2021.550676)
Supplement: Supplementary file 2 [file Data_Sheet_2.xlsx]

## Sheet: Table S1
Table S1 Detailed sample information in our study
Breeds_abbrev	Breeds	Sample ID	Area	Area-abbrev	sub-population	sub-population_abbrev	Depth
X	Xiang	SRS465762	Asian domestic breed	ASD			27.4
	Xiang	SRS465763	Asian domestic breed	ASD			29.16
	Xiang	SRS465764	Asian domestic breed	ASD			26.6
	Xiang	SRS465765	Asian domestic breed	ASD			28.2
	Xiang	SRS465766	Asian domestic breed	ASD			27.84
	Xiang	SRS465767	Asian domestic breed	ASD			27.84
	Xiang	ERR173223	Asian domestic breed	ASD			7.36
	Xiang	ERR173224	Asian domestic breed	ASD			7.24
	Xiang	XI01U03	Asian domestic breed	ASD			10.32
	Xiang	XI01U04	Asian domestic breed	ASD			10.36
DN	Diannan small-ear	SRS2040930	Asian domestic breed	ASD			16
	Diannan small-ear	SRS2040686	Asian domestic breed	ASD			16.8
DWZ	Daweizi	SRS2043610	Asian domestic breed	ASD			11.7376
EHL	Erhualian	SRS465714	Asian domestic breed	ASD			28.4
	Erhualian	SRS465715	Asian domestic breed	ASD			27.48
HTDE	Hetaodaer	SRS465750	Asian domestic breed	ASD			26.72
	Hetaodaer	SRS465751	Asian domestic breed	ASD			25.56
	Hetaodaer	SRS465752	Asian domestic breed	ASD			21.44
	Hetaodaer	SRS465753	Asian domestic breed	ASD			25.12
	Hetaodaer	SRS465754	Asian domestic breed	ASD			26.16
	Hetaodaer	SRS465755	Asian domestic breed	ASD			25.64
JH	Jinhua	SRR652374	Asian domestic breed	ASD			4.64
	Jinhua	SRR652375	Asian domestic breed	ASD			4.96
	Jinhua	SRR652376	Asian domestic breed	ASD			4.24
	Jinhua	ERS804942	Asian domestic breed	ASD			10.28
	Jinhua	ERS804943	Asian domestic breed	ASD			11.44
JQH	Jiangquhai	ERR173179	Asian domestic breed	ASD			10.56
	Jiangquhai	JQ01U02	Asian domestic breed	ASD			10.56
	Jiangquhai	JQ01U03	Asian domestic breed	ASD			11.28
	Jiangquhai	JQ01U08	Asian domestic breed	ASD			11.84
LPS	Leping_Spotted	LSP01U16	Asian domestic breed	ASD			12.16
	Leping_Spotted	LSP01U18	Asian domestic breed	ASD			15.52
LUC	Luchuan	SRS465722	Asian domestic breed	ASD			24.4
	Luchuan	SRS465723	Asian domestic breed	ASD			27.92
	Luchuan	SRS465724	Asian domestic breed	ASD			27.96
	Luchuan	SRS465725	Asian domestic breed	ASD			27.32
	Luchuan	SRS465726	Asian domestic breed	ASD			29.12
	Luchuan	SRS465727	Asian domestic breed	ASD			25.68
LW	Laiwu	SRS465768	Asian domestic breed	ASD			26.24
	Laiwu	SRS465769	Asian domestic breed	ASD			24.64
	Laiwu	SRS465770	Asian domestic breed	ASD			28.4
	Laiwu	SRS465771	Asian domestic breed	ASD			27.48
	Laiwu	SRS465772	Asian domestic breed	ASD			27.92
	Laiwu	SRS465773	Asian domestic breed	ASD			27.76
MIN	Min pig	SRS465756	Asian domestic breed	ASD			26.72
	Min pig	SRS465757	Asian domestic breed	ASD			26.32
	Min pig	SRS465758	Asian domestic breed	ASD			27.16
	Min pig	SRS465759	Asian domestic breed	ASD			24.12
	Min pig	SRS465760	Asian domestic breed	ASD			27.76
	Min pig	SRS465761	Asian domestic breed	ASD			27.32
NJ	Neijiang	SRR652357	Asian domestic breed	ASD			6.28
	Neijiang	SRR652362	Asian domestic breed	ASD			6.92
	Neijiang	SRR652363	Asian domestic breed	ASD			4.56
PZ	Penzhou	SRR652348	Asian domestic breed	ASD			4.72
RC	Rongchang	SRS2040441	Asian domestic breed	ASD			16.8
	Rongchang	SRS518091	Asian domestic breed	ASD			7.64
	Rongchang	SRS518092	Asian domestic breed	ASD			11.96
	Rongchang	SRS518093	Asian domestic breed	ASD			10.52
	Rongchang	SRS518094	Asian domestic breed	ASD			10.48
	Rongchang	SRS518095	Asian domestic breed	ASD			10.88
	Rongchang	SRS518096	Asian domestic breed	ASD			10.08
WJ	Wujin	SRR652351	Asian domestic breed	ASD			6.36
	Wujin	SRR652352	Asian domestic breed	ASD			5.68
TC	Tongcheng	SRX473146	Asian domestic breed	ASD			9
	Tongcheng	SRX473147	Asian domestic breed	ASD			11.76
	Tongcheng	SRX473148	Asian domestic breed	ASD			7
	Tongcheng	SRX473149	Asian domestic breed	ASD			6.64
WNS	Wannan_Spotted	WS01U03	Asian domestic breed	ASD			11.16
	Wannan_Spotted	WS01U13	Asian domestic breed	ASD			10.64
WZS	Wuzhishan	SRS465708	Asian domestic breed	ASD			26.84
	Wuzhishan	SRS465709	Asian domestic breed	ASD			27.24
	Wuzhishan	SRS465710	Asian domestic breed	ASD			26.44
	Wuzhishan	SRS465711	Asian domestic breed	ASD			26.52
	Wuzhishan	SRS465712	Asian domestic breed	ASD			27.12
	Wuzhishan	SRS465713	Asian domestic breed	ASD			27.84
YN	Ya'nan	SRR652354	Asian domestic breed	ASD			4.84
	Ya'nan	SRR652355	Asian domestic breed	ASD			4.44
	Ya'nan	SRR652356	Asian domestic breed	ASD			5.24
MS	Meishan	SRS2053229	Asian domestic breed	ASD			10.2457
	Meishan	SRS2053343	Asian domestic breed	ASD			9.79265
	Meishan	SRS2052083	Asian domestic breed	ASD			10.8124
	Meishan	SRS2051325	Asian domestic breed	ASD			10.998
	Meishan	SRS2048849	Asian domestic breed	ASD			11.3568
	Meishan	SRS2048848	Asian domestic breed	ASD			11.9695
	Meishan	SRS2048284	Asian domestic breed	ASD			10.8123
	Meishan	SRS2048245	Asian domestic breed	ASD			11.2087
	Meishan	SRS2048172	Asian domestic breed	ASD			11.6137
	Meishan	SRS2048171	Asian domestic breed	ASD			12.2201
	Meishan	SRS2046488	Asian domestic breed	ASD			11.1803
	Meishan	SRS2046487	Asian domestic breed	ASD			12.7229
	Meishan	SRS2046281	Asian domestic breed	ASD			9.63865
	Meishan	SRS2046192	Asian domestic breed	ASD			10.8144
	Meishan	SRS2044542	Asian domestic breed	ASD			10.3126
	Meishan	SRS2044055	Asian domestic breed	ASD			10.2253
	Meishan	SRS2044030	Asian domestic breed	ASD			10.7686
	Meishan	SRS2043995	Asian domestic breed	ASD			10.8743
	Meishan	SRS2043915	Asian domestic breed	ASD			11.7366
	Meishan	SRS2043856	Asian domestic breed	ASD			11.4436
	Meishan	SRS2043854	Asian domestic breed	ASD			11.3789
	Meishan	SRS2043852	Asian domestic breed	ASD			9.78133
	Meishan	SRS2043849	Asian domestic breed	ASD			11.218
	Meishan	SRS2043845	Asian domestic breed	ASD			10.5244
	Meishan	SRS2043609	Asian domestic breed	ASD			11.8428
	Meishan	SRS2043302	Asian domestic breed	ASD			8.80755
	Meishan	SRS2043301	Asian domestic breed	ASD			11.1212
	Meishan	SRS2043292	Asian domestic breed	ASD			10.5685
	Meishan	SRS2043291	Asian domestic breed	ASD			12.4745
	Meishan	SRS2040900	Asian domestic breed	ASD			10.8403
	Meishan	SRS2040260	Asian domestic breed	ASD			11.424
	Meishan	SRS2048767	Asian domestic breed	ASD			11.872
	Meishan	MS21M01	Asian domestic breed	ASD			10.76
	Meishan	MS21M05	Asian domestic breed	ASD			12.92
	Meishan	MS21M08	Asian domestic breed	ASD			11.16
	Meishan	MS20M03	Asian domestic breed	ASD			12.32
	Meishan	MS20M05	Asian domestic breed	ASD			12.84
	Meishan	MS20U10	Asian domestic breed	ASD			20
	Meishan	MS20U11	Asian domestic breed	ASD			19.76
	Meishan	MS20U13	Asian domestic breed	ASD			11.52
	Meishan	MS21M07	Asian domestic breed	ASD			20.6
	Meishan	MS21M14	Asian domestic breed	ASD			26.44
TWB	Tibetan wild boar	SRR652257	Asian Wild breed	ASW	Ganzi	TWBGZ	4.8
	Tibetan wild boar	SRR652258	Asian Wild breed	ASW	Ganzi	TWBGZ	4.88
	Tibetan wild boar	SRR652259	Asian Wild breed	ASW	Ganzi	TWBGZ	4.24
	Tibetan wild boar	SRR652260	Asian Wild breed	ASW	Ganzi	TWBGZ	5.72
	Tibetan wild boar	SRR652261	Asian Wild breed	ASW	Ganzi	TWBGZ	5.68
	Tibetan wild boar	SRR652262	Asian Wild breed	ASW	Diqing	TWBD	6.4
	Tibetan wild boar	SRR652264	Asian Wild breed	ASW	Diqing	TWBD	4.72
	Tibetan wild boar	SRR652265	Asian Wild breed	ASW	Diqing	TWBD	7.04
	Tibetan wild boar	SRR652267	Asian Wild breed	ASW	Nyingchi	TWBN	3.92
	Tibetan wild boar	SRR652268	Asian Wild breed	ASW	Nyingchi	TWBN	7.6
	Tibetan wild boar	SRR652269	Asian Wild breed	ASW	Nyingchi	TWBN	5.36
	Tibetan wild boar	SRR652270	Asian Wild breed	ASW	Nyingchi	TWBN	4.88
	Tibetan wild boar	SRR652302	Asian Wild breed	ASW	Nyingchi	TWBN	7.16
	Tibetan wild boar	SRR652327	Asian Wild breed	ASW	Gannan	TWBGN	6.24
	Tibetan wild boar	SRR652339	Asian Wild breed	ASW	Gannan	TWBGN	4.8
	Tibetan wild boar	SRR652340	Asian Wild breed	ASW	Gannan	TWBGN	5.16
	Tibetan wild boar	SRR652341	Asian Wild breed	ASW	Gannan	TWBGN	5
	Tibetan wild boar	SRR652342	Asian Wild breed	ASW	Gannan	TWBGN	4.68
	Tibetan wild boar	SRR652343	Asian Wild breed	ASW	A'ba	TWBA	4.6
	Tibetan wild boar	SRR652344	Asian Wild breed	ASW	A'ba	TWBA	7.44
	Tibetan wild boar	SRR652345	Asian Wild breed	ASW	A'ba	TWBA	5.8
	Tibetan wild boar	SRR652346	Asian Wild breed	ASW	A'ba	TWBA	7.4
	Tibetan wild boar	SRR652347	Asian Wild breed	ASW	A'ba	TWBA	6.04
	Tibetan wild boar	SRS465728	Asian Wild breed	ASW	Tibet	TT	28.04
	Tibetan wild boar	SRS465729	Asian Wild breed	ASW	Tibet	TT	26.24
	Tibetan wild boar	SRS465730	Asian Wild breed	ASW	Tibet	TT	22.92
	Tibetan wild boar	SRS465731	Asian Wild breed	ASW	Tibet	TT	21.88
	Tibetan wild boar	SRS465732	Asian Wild breed	ASW	Tibet	TT	23.56
	Tibetan wild boar	SRS465733	Asian Wild breed	ASW	Tibet	TT	28.68
	Tibetan wild boar	SRS465734	Asian Wild breed	ASW	Yunnan	YNT	29.32
	Tibetan wild boar	SRS465735	Asian Wild breed	ASW	Yunnan	YNT	24.28
	Tibetan wild boar	SRS465736	Asian Wild breed	ASW	Yunnan	YNT	28.76
	Tibetan wild boar	SRS465737	Asian Wild breed	ASW	Yunnan	YNT	29.16
	Tibetan wild boar	SRS465738	Asian Wild breed	ASW	Yunnan	YNT	28.04
	Tibetan wild boar	SRS465739	Asian Wild breed	ASW	Yunnan	YNT	27.6
	Tibetan wild boar	SRS465740	Asian Wild breed	ASW	Sichuan	SCT	27.6
	Tibetan wild boar	SRS465741	Asian Wild breed	ASW	Sichuan	SCT	27.2
	Tibetan wild boar	SRS465742	Asian Wild breed	ASW	Sichuan	SCT	27.2
	Tibetan wild boar	SRS465743	Asian Wild breed	ASW	Sichuan	SCT	27.84
	Tibetan wild boar	SRS465744	Asian Wild breed	ASW	Sichuan	SCT	29.28
	Tibetan wild boar	SRS465745	Asian Wild breed	ASW	Sichuan	SCT	28.64
	Tibetan wild boar	SRS465746	Asian Wild breed	ASW	Gansu	GST	28.16
	Tibetan wild boar	SRS465747	Asian Wild breed	ASW	Gansu	GST	25.12
	Tibetan wild boar	SRS465748	Asian Wild breed	ASW	Gansu	GST	26.36
	Tibetan wild boar	SRS465749	Asian Wild breed	ASW	Gansu	GST	26.28
AWD	Asian wild boar	SRS2043996	Asian Wild breed	ASW			15.8368
Japan	Japan	WB20U02	Asian Wild breed	ASW			15.8
KWB	Korean wild boar	SRS703307	Asian Wild breed	ASW			17.92
	Korean wild boar	SRS703308	Asian Wild breed	ASW			17.08
	Korean wild boar	SRS703309	Asian Wild breed	ASW			16.88
	Korean wild boar	SRS703310	Asian Wild breed	ASW			16.84
	Korean wild boar	SRS703311	Asian Wild breed	ASW			16.96
	Korean wild boar	SRS703312	Asian Wild breed	ASW			16.28
	Korean wild boar	SRS703313	Asian Wild breed	ASW			17.56
	Korean wild boar	SRS703314	Asian Wild breed	ASW			17.52
	Korean wild boar	SRS703315	Asian Wild breed	ASW			17.36
	Korean wild boar	SRS703316	Asian Wild breed	ASW			17.36
SECW	Southest China wild boar	SRR652377	Asian Wild breed	ASW			4.8
	Southest China wild boar	SRR652378	Asian Wild breed	ASW			6.52
	Southest China wild boar	SRR652379	Asian Wild breed	ASW			6.52
SCWB	South China wild boar	WB29U04	Asian Wild breed	ASW			9.4
	South China wild boar	WB29U13	Asian Wild breed	ASW			6.44
	South China wild boar	WB29U16	Asian Wild breed	ASW			15.48
NCWB	North China wild boar	WB30U01	Asian Wild breed	ASW			8.6
	North China wild boar	WB30U08	Asian Wild breed	ASW			14.44
	North China wild boar	WB30U09	Asian Wild breed	ASW			16
CWB	China wild boar	SRS465717	Asian Wild breed	ASW			29.04
	China wild boar	SRS465718	Asian Wild breed	ASW			28.44
	China wild boar	SRS465719	Asian Wild breed	ASW			28.44
	China wild boar	SRS465720	Asian Wild breed	ASW			21.92
	China wild boar	SRS465721	Asian Wild breed	ASW			21.48
Sum	Sumatran	ERR173176	Asian Wild breed	ASW			5.68
	Sumatran	ERR173178	Asian Wild breed	ASW			8.08
Sub	Sus barbatus	ERR173177	South-east Asia	SEA			19.8
Suceb	Sus cebifrons	ERR173209	South-east Asia	SEA			10.36
Sucel	Sus celebensis	ERR173210	South-east Asia	SEA			50.04
Susv	Sus verrucosus	ERR173211	South-east Asia	SEA			11.12
	Sus verrucosus	SVSV01U01	South-east Asia	SEA			10.84
Pha	Phacochoerus africanus	ERR173203	Africa	AF			10.52
Gua	Guatemala	CRGU1508	Central America	CA			11.92
Duroc	Duroc	SRS2058802	European domestic breed	EUD			10.8469
	Duroc	SRS2058801	European domestic breed	EUD			10.5099
	Duroc	SRS2053847	European domestic breed	EUD			10.4202
	Duroc	SRS2053398	European domestic breed	EUD			10.322
	Duroc	SRS2053343	European domestic breed	EUD			11.1724
	Duroc	SRS2051177	European domestic breed	EUD			10.9079
	Duroc	SRS2048267	European domestic breed	EUD			11.4779
	Duroc	SRS2045986	European domestic breed	EUD			11.2975
	Duroc	SRS2045879	European domestic breed	EUD			10.6731
	Duroc	SAMN06563662	European domestic breed	EUD			13.2503
	Duroc	SRS2044043	European domestic breed	EUD			11.4585
	Duroc	SAMN06563578	European domestic breed	EUD			10.8015
	Duroc	SRS2043998	European domestic breed	EUD			9.95189
	Duroc	SRS2043983	European domestic breed	EUD			10.1855
	Duroc	SRS2043859	European domestic breed	EUD			10.4307
	Duroc	SRS2043858	European domestic breed	EUD			11.3533
	Duroc	SRS2043855	European domestic breed	EUD			12.5531
	Duroc	SRS2043851	European domestic breed	EUD			10.1139
	Duroc	SRS2043848	European domestic breed	EUD			12.518
	Duroc	SRS2043844	European domestic breed	EUD			13.4323
	Duroc	SRS2043608	European domestic breed	EUD			12.1837
	Duroc	SRS2043305	European domestic breed	EUD			11.2884
	Duroc	SRS2043303	European domestic breed	EUD			12.7068
	Duroc	SRS2043300	European domestic breed	EUD			12.0187
	Duroc	SRS2043293	European domestic breed	EUD			9.83938
	Duroc	SRS2043289	European domestic breed	EUD			10.4277
	Duroc	SRS2040661	European domestic breed	EUD			10.6162
	Duroc	DU23M03	European domestic breed	EUD			10.48
	Duroc	DU22M02	European domestic breed	EUD			14.32
	Duroc	DU23M04	European domestic breed	EUD			10.4
	Duroc	DU22M01	European domestic breed	EUD			16
	Duroc	SRS2040660	European domestic breed	EUD			11.0096
LD	Landrace	ERR173180	European domestic breed	EUD			7.6
	Landrace	ERR173181	European domestic breed	EUD			11.24
	Landrace	ERR173182	European domestic breed	EUD			7.36
	Landrace	ERR173183	European domestic breed	EUD			6.04
	Landrace	ERR173184	European domestic breed	EUD			6.2
	Landrace	SRS2043847	European domestic breed	EUD			11.256
	Landrace	LR24F08	European domestic breed	EUD			31.8
	Landrace	LR30F03	European domestic breed	EUD			10.44
	Landrace	LR30F04	European domestic breed	EUD			11.96
	Landrace	LR21M03	European domestic breed	EUD			11.24
Yorkshire	Yorkshire	ERR173185	European domestic breed	EUD			4.48
	Yorkshire	ERR173186	European domestic breed	EUD			10.32
	Yorkshire	ERR173187	European domestic breed	EUD			10.32
	Yorkshire	ERR173188	European domestic breed	EUD			10.32
	Yorkshire	ERR173189	European domestic breed	EUD			7.68
	Yorkshire	ERR173190	European domestic breed	EUD			11.44
	Yorkshire	ERR173191	European domestic breed	EUD			7.8
	Yorkshire	ERR173192	European domestic breed	EUD			10.36
	Yorkshire	ERR173193	European domestic breed	EUD			10.12
	Yorkshire	ERR173194	European domestic breed	EUD			6.92
	Yorkshire	ERR173195	European domestic breed	EUD			7.2
	Yorkshire	ERR173196	European domestic breed	EUD			7.68
	Yorkshire	ERR173197	European domestic breed	EUD			7
	Yorkshire	ERR173198	European domestic breed	EUD			7.04
	Yorkshire	SRS2043916	European domestic breed	EUD			11.7264
	Yorkshire	LW22M04	European domestic breed	EUD			13.76
PT	Pietrain	ERR173204	European domestic breed	EUD			10.56
	Pietrain	ERR173205	European domestic breed	EUD			10.65
	Pietrain	ERR173206	European domestic breed	EUD			6.88
	Pietrain	ERR173207	European domestic breed	EUD			4.52
	Pietrain	ERR173208	European domestic breed	EUD			11.08
	Pietrain	PI21M20	European domestic breed	EUD			11.44
Ans	Angler_Sattleschwein	AS01F09	European domestic breed	EUD			13.84
Cal	Calabrese	CA01F14	European domestic breed	EUD			15.84
Cin	Cinta_Senese	CS01F02	European domestic breed	EUD			13.8
Cas	Casertana	CT01F13	European domestic breed	EUD			13.04
	Casertana	CT01M12	European domestic breed	EUD			10.2
Lei	Leicoma	LE01F25	European domestic breed	EUD			15.28
Bun	Bunte_Bentheimer	BB01M47	European domestic breed	EUD			17
Berk	Berkshire	BK01F10	European domestic breed	EUD			14.4
	Berkshire	BK01M20	European domestic breed	EUD			12.12
NeV	Netherlands,Veluwe	ERR173213	European wild breed	EUW			7.52
	Netherlands,Veluwe	ERR173214	European wild breed	EUW			11.4
NeM	Netherlands,Meinweg	ERR173215	European wild breed	EUW			4.36
	Netherlands,Meinweg	ERR173216	European wild breed	EUW			6.52
SWD	Switzerland	ERR173218	European wild breed	EUW			11.76
	Switzerland	WB26M09	European wild breed	EUW			18.16
France	France	WB25U11	European wild breed	EUW			12.28
	France	ERR173217	European wild breed	EUW			7.68
Greece	Greece	WB32F07	European wild breed	EUW			13.4
	Greece	WB32U05	European wild breed	EUW			12.68
	Greece	WB31F05	European wild breed	EUW			15.92
	Greece	WB31M09	European wild breed	EUW			12.52
Neth	Netherlands	WB21F05	European wild breed	EUW			11.72
	Netherlands	WB22F03	European wild breed	EUW			14.68
	Netherlands	WB22M02	European wild breed	EUW			21.88
	Netherlands	WB21F03	European wild breed	EUW			16.76
	Netherlands	WB21F04	European wild breed	EUW			20
	Netherlands	WB21M05	European wild breed	EUW			29.16
	Netherlands	WB22F02	European wild breed	EUW			10.32
	Netherlands	WB22F04	European wild breed	EUW			13.92
	Netherlands	WB22M03	European wild breed	EUW			18.52
	Netherlands	WB21F10	European wild breed	EUW			14.52
	Netherlands	WB22F01	European wild breed	EUW			13.36
Ita	Italy	WB28F31	European wild breed	EUW			19.4
	Italy	WB42M09	European wild breed	EUW			15.28
	Italy	WB44U06	European wild breed	EUW			14.8
	Italy	WB44U07	European wild breed	EUW			13.28
	Italy	WB28M39	European wild breed	EUW			13.76
NE	Near_East	WB33U04	European wild breed	EUW			13.92
	Near_East	WB33U05	European wild breed	EUW			12.8
	Near_East	WB72U01	European wild breed	EUW			5.16
WBES	Wild Boar(Spain)	WBES0717	European wild breed	EUW			10.28

## Sheet: Table S2
Table S2 SV validation information through PCR
chromosome	start	end	breed	type	Upstream primer	Downstream primer
chr1	7811332	7815641	Tibetan wild boar	deletion	TAGATTCAGCAGGAGGAAAGAT	TCACAAGGACTCAGCAGACAC
chr12	55146417	55150729	Tibetan wild boar	deletion	AAGAGGCTGTGATACTGTGCTT	AGTGCCAAGTAACAACGGCT
chr13	2768221	2772981	Tibetan wild boar	deletion	GAGGTCTGTGAAAGGGGAATGT	ACCCTTGTATTGCTGGAAAAGT
chr13	171840730	171845031	Tibetan wild boar	deletion	TGTGTGAATCCTACCATGCG	AGAAGAGTGGCTACTGCCAAAG
chr13	126327574	126331888	Tibetan wild boar	deletion	CCCTGCTTTACCCAAGACCC	GACCACTCAAGCAGCACAGA
chr16	7555985	7560289	Tibetan wild boar	deletion	TCTCGCTTGGGTCAACAATCA	TTCTGGGTCAGGAAAGTTGTTCA
chrX	3149438	3153752	Tibetan wild boar	deletion	CATGGCGACAGGTTGCATTC	TGGGCTCCAGTCTACCAGAA
chrX	52079454	52083699	Tibetan wild boar	deletion	AGTTTTTAAAGAATGCTACATGGGA	AATTTACCAGCACACTGTTCATAAT
chr1	3528380	3528768	Meishan pig	deletion	ACCAGAGAGTCTGAAGCCTGTA	GTGGGTGTGTAGGTAGCCG
chr1	159640462	159644812	Meishan pig	deletion	GGCCTTCCAGATATGTTTTAGCA	CAGGACTGTGTTGGCTATTCC
chr1	160885173	160889479	Meishan pig	deletion	ATTGCCTCCTCTGCCTTCAC	CCTTTCCAGCAAGGTAGCCA
chr2	4389893	4394202	Meishan pig	deletion	TTGGCCTCGTTGGTCTTTGT	TCCTACCGAACACCATGTGC
chr3	3411468	3415957	Meishan pig	deletion	CCCACTCGCTGCAACCTG	ACGGATGTTGGGCTGAGATA
chr7	110015980	110020287	Meishan pig	deletion	GGACCCCTCTCTCTTGGTTC	GCAGGAAATACACAGTTTTGCC
chr9	7262802	7267100	Meishan pig	deletion	TTTATACTCCCAGGCCCTCG	CATTCGCAGCATATGGAGGT
chr9	117604552	117608853	Meishan pig	deletion	ACCCATACACCCAACATCCA	AGGAACCAAGCTTCTCCAGG

## Sheet: Table S3
Table S3 64 candidate deletion sites identified by △AF and RFD
chromosome	start	end
chr1	14952555	14952840
chr1	35948700	35949053
chr1	36127047	36127334
chr1	55354261	55356661
chr1	114343335	114343601
chr1	242637039	242637204
chr1	243463903	243463958
chr1	255699985	255700108
chr2	14527386	14527659
chr2	22095308	22095371
chr2	53615368	53615695
chr2	90069062	90069118
chr2	129760253	129761035
chr3	1245312	1246295
chr3	19063983	19065342
chr3	22755116	22755430
chr3	86725217	86725524
chr4	24408803	24409119
chr4	26115670	26116379
chr4	121774890	121775025
chr5	84495942	84496031
chr5	88312575	88312922
chr5	88968356	88968651
chr6	29649953	29651472
chr6	76086014	76086066
chr6	138995028	138995109
chr6	145166244	145166379
chr6	166197772	166198098
chr7	121162557	121162908
chr8	126595827	126595906
chr8	135821484	135821948
chr9	36412376	36412708
chr9	123423928	123423999
chr10	4943428	4943491
chr10	19011189	19013864
chr11	36215241	36215368
chr11	65393781	65394704
chr12	6378975	6379027
chr12	9775525	9775656
chr13	44634012	44634321
chr13	53254990	53255282
chr13	77963230	77963624
chr13	141290748	141290825
chr13	154405083	154405168
chr13	170539649	170539965
chr13	193750017	193750343
chr14	17963463	17963780
chr14	31216326	31216388
chr14	47120506	47121116
chr15	9798377	9798479
chr15	114279045	114279465
chr16	613094	616230
chr16	6361624	6361968
chr16	20219129	20219253
chr16	39505321	39505591
chr17	9341571	9341709
chr17	29932296	29932348
chr17	40186942	40187032
chr17	60527343	60527672
chr18	15901249	15901576
chrX	1157937	1165874
chrX	3142691	3143221
chrX	8668519	8668827
chrX	114371731	114372010

## Sheet: Table S4
Table S4 GO enrichment analyses based on candidate deletion sites identified by △AF and RFD
#Term	Database	ID	Input number	Background number	P-Value	Corrected P-Value
mitochondrial inner membrane	Gene Ontology	GO:0005743	2	102	0.00174668	0.0384307
organelle inner membrane	Gene Ontology	GO:0019866	2	112	0.00209382	0.0384307
mitochondrial membrane	Gene Ontology	GO:0031966	2	143	0.00336032	0.0384307
NADH dehydrogenase (quinone) activity	Gene Ontology	GO:0050136	1	5	0.00368877	0.0384307
NADH dehydrogenase (ubiquinone) activity	Gene Ontology	GO:0008137	1	5	0.00368877	0.0384307
mitochondrial envelope	Gene Ontology	GO:0005740	2	156	0.00397559	0.0384307
NADH dehydrogenase activity	Gene Ontology	GO:0003954	1	7	0.00491567	0.0407299
oxidoreductase activity, acting on NAD(P)H, quinone or similar compound as acceptor	Gene Ontology	GO:0016655	1	9	0.00614123	0.0445239
envelope	Gene Ontology	GO:0031975	2	224	0.00797419	0.0462503
organelle envelope	Gene Ontology	GO:0031967	2	224	0.00797419	0.0462503
oxidoreductase activity	Gene Ontology	GO:0016491	2	243	0.00931773	0.0482214
respiratory chain complex I	Gene Ontology	GO:0045271	1	18	0.0116396	0.0482214
mitochondrial respiratory chain complex I	Gene Ontology	GO:0005747	1	18	0.0116396	0.0482214
NADH dehydrogenase complex	Gene Ontology	GO:0030964	1	18	0.0116396	0.0482214
oxidation-reduction process	Gene Ontology	GO:0055114	2	291	0.013132	0.0488158
oxidoreductase activity, acting on NAD(P)H	Gene Ontology	GO:0016651	1	21	0.0134664	0.0488158

## Sheet: Table S5
Table S5 The predicted splicing sites in the 140bp region before and after remove the deletion sequence
The predicted splicing sites in the 140bp region before remove the deletion sequence
					Activations**
Position (bp)	Putative splice site	Sequence	Score*	Intron GC*	Alt./Cryptic	Constitutive	Confidence**
497	Alt. isoform/cryptic acceptor	agatcctcagGAAGAGGGGT	2.787	0.443	0.674	0.311	0.538
504	Alt. isoform/cryptic donor	AGGAAGAGGGgttaggacaa	5.793	0.543	0.92	0.055	0.94
The predicted splicing sites in the 140bp region after remove the deletion sequence
					Activations**
Position (bp)	Putative splice site	Sequence	Score*	Intron GC*	Alt./Cryptic	Constitutive	Confidence**
486	Alt. isoform/cryptic donor	GGAGCTCAGGgtggggatca	9.07	0.529	0.687	0.239	0.652
545	Alt. isoform/cryptic donor	ACGTCTTCCAgttagatact	4.609	0.357	0.89	0.077	0.913
547	Alt. isoform/cryptic acceptor	cgtcttccagTTAGATACTT	2.368	0.6	0.842	0.156	0.815
551	Alt. isoform/cryptic acceptor	ttccagttagATACTTGCAG	3.135	0.571	0.658	0.332	0.495
561	Alt. isoform/cryptic acceptor	atacttgcagGACAAAATTT	4.516	0.529	0.535	0.447	0.164
602	Alt. isoform/cryptic acceptor	tcatatctagAAAAGCACTA	2.583	0.414	0.789	0.203	0.743

## Sheet: Table S6
Table S6 Specific duplications in Meishan pig
chromosome	start	end
chr1	12143011	12223936
chr1	37927638	38186907
chr1	50985740	51112165
chr1	53458040	53480625
chr1	58901845	59080328
chr1	100042496	100044096
chr1	135770202	135771175
chr1	168420793	168578393
chr1	185214592	185246100
chr1	194627125	194628063
chr1	195473894	195532496
chr1	227153833	227231301
chr1	230876644	230877619
chr1	246122252	246170203
chr1	263676262	263743843
chr2	6553206	6554365
chr2	12043649	12068222
chr2	14163530	14322479
chr2	26973363	26973937
chr2	54215367	54247519
chr2	57798488	57827931
chr2	61601509	61619434
chr2	65930488	65931112
chr2	71126257	71127070
chr2	72105720	72108818
chr2	82146677	82148284
chr2	116835764	116836363
chr2	141190577	141347545
chr3	7865250	7876163
chr3	7917529	7918201
chr3	10596242	10596918
chr3	19687938	19689659
chr3	54977587	54981275
chr3	57248515	57267388
chr3	82353645	82693581
chr3	88347168	88347488
chr3	103103045	103290656
chr3	111333107	111362951
chr3	112220200	112220865
chr3	113460989	113461670
chr3	122619103	122667064
chr4	5151234	5251812
chr4	6173481	6205844
chr4	38021829	38030451
chr4	45938836	45943483
chr4	96062482	96067617
chr4	106029815	106094936
chr4	117408510	117411594
chr4	128508692	128509793
chr5	10883073	10883351
chr5	20271192	20275911
chr5	58272976	58307548
chr5	68921443	68922036
chr5	69865924	70001276
chr5	81173395	81215239
chr5	82087178	82122232
chr6	95918976	95920928
chr6	106973640	107059307
chr6	109558719	109663173
chr6	132649297	132725297
chr6	133184466	133185035
chr6	136533674	136535220
chr6	138022871	138199075
chr6	140015763	140017602
chr6	143691056	143697421
chr6	152412609	152527985
chr6	156569039	156584907
chr6	162722090	162760531
chr7	12511583	12512783
chr7	27291835	27300295
chr7	70358339	70444322
chr7	79148182	79194357
chr7	91127728	91129169
chr7	113474477	113501781
chr8	13924820	13963594
chr8	72809910	73084277
chr8	98010251	98011022
chr8	101879059	101880582
chr8	121262451	121263379
chr8	124727804	124736011
chr8	127227447	127228402
chr8	130995703	131089290
chr8	131781949	131787525
chr8	134047983	134048641
chr9	4728491	4758225
chr9	60372071	60400724
chr9	68621085	68621970
chr9	73274900	73404354
chr9	83588489	83748069
chr9	104405520	104457293
chr9	107264223	107270203
chr9	121115273	121115900
chr9	127999231	128003899
chr9	130573554	130574702
chr9	135607096	135607255
chr10	12002965	12003737
chr10	52804285	52845647
chr10	55134450	55150368
chr11	29014689	29061013
chr11	42230917	42231830
chr11	43519023	43519573
chr11	62633913	62636284
chr11	79045337	79045694
chr12	21358657	21368219
chr13	9340458	9386396
chr13	40167612	40174235
chr13	41124329	42128767
chr13	81456483	81456814
chr13	85017782	85019311
chr13	103968080	103969432
chr13	113649102	113661777
chr13	131358304	131362060
chr13	148815027	148822403
chr13	159777352	159826193
chr13	168378662	168433829
chr13	187142856	187174478
chr13	188730974	188751572
chr13	192787439	192788409
chr14	17525642	17565306
chr14	23671573	24002779
chr14	48790834	48841391
chr14	79814461	79815054
chr14	84660489	84718773
chr14	87357217	87401388
chr14	98182686	98186559
chr14	100998386	101203118
chr14	106431069	106692259
chr14	113879440	113930199
chr14	124263551	124282281
chr14	126644086	126644995
chr14	132230022	132289203
chr14	138517132	139430857
chr15	11565890	11586591
chr15	34902423	35167306
chr15	51497776	51518845
chr15	74264886	74343176
chr15	77553943	77556558
chr15	81358861	81374591
chr15	84211900	84258830
chr15	85656852	85803269
chr15	130286383	130286963
chr15	131935195	132061982
chr16	10793220	10941513
chr16	12137781	12139727
chr16	40095368	40562969
chr16	57036841	57139404
chr16	66818754	66854105
chr17	5746985	5748714
chr17	6034472	6048013
chr17	13554341	13601257
chr17	21251381	21286873
chr17	32227254	32262818
chr17	34620897	34621142
chr17	48031418	48032857
chr18	6211829	6212173
chr18	16438510	16499183
chr18	42634203	42634688
chr18	50155142	50155872
chrX	1898979	1932971
chrX	6456695	6533149
chrX	9970224	9980836
chrX	19243250	19256006
chrX	31738819	31755722
chrX	33270666	33347308
chrX	33735309	33745383
chrX	67119000	67292639
chrX	71631630	71698245
chrX	77205594	77222752
chrX	80952952	80984123
chrX	111523353	111525472

## Sheet: Table S7
Table S7 Specific insertions in Meishan pig
chromosome	start	end
chr1	2282249	2282250
chr1	13962624	13962625
chr1	19913244	19913245
chr1	244324871	244324872
chr1	260247280	260247281
chr2	67600402	67600403
chr2	139828554	139828555
chr2	146115804	146115805
chr3	5947438	5947439
chr3	22099428	22099429
chr3	33983272	33983273
chr3	36496020	36496021
chr3	48516120	48516121
chr3	79851635	79851636
chr3	124642976	124642977
chr4	100657149	100657150
chr4	101970000	101970001
chr5	2587596	2587597
chr5	17596362	17596363
chr5	20765518	20765519
chr5	23303708	23303709
chr5	25586622	25586623
chr5	91931392	91931393
chr6	3215619	3215620
chr6	153098289	153098290
chr7	6909025	6909026
chr7	65757319	65757320
chr7	110304230	110304231
chr7	114892403	114892404
chr7	79033263	79033264
chr8	18474673	18474674
chr8	27097597	27097598
chr8	38032302	38032303
chr8	47417221	47417222
chr8	50643378	50643379
chr8	88541158	88541159
chr8	89982215	89982216
chr8	96455811	96455812
chr8	124624234	124624235
chr9	5558044	5558045
chr9	6116617	6116618
chr9	20648975	20648976
chr9	57640148	57640149
chr9	71251600	71251601
chr10	2377798	2377799
chr10	10648845	10648846
chr10	10952248	10952249
chr10	16718153	16718154
chr10	15746053	15746054
chr10	33647654	33647655
chr10	67490687	67490688
chr11	1422364	1422365
chr11	16070808	16070809
chr11	20521179	20521180
chr11	28719643	28719644
chr11	31203828	31203829
chr12	35712900	35712901
chr13	45832088	45832089
chr13	129006232	129006233
chr13	187864576	187864577
chr13	192426088	192426089
chr13	201846899	201846900
chr14	17273880	17273881
chr14	25408584	25408585
chr14	129891661	129891662
chr15	65835643	65835644
chr15	110004472	110004473
chr15	130286378	130286379
chr16	6160933	6160934
chr16	12040396	12040397
chr16	39248732	39248733
chr16	56379553	56379554
chr16	74999318	74999319
chr18	46809413	46809414
chrX	25962788	25962789
chrX	32248305	32248306
chrX	85789774	85789775

## Sheet: Table S8
Table S8 The primer information of IDO2 gene
IDO2 gene
	Sequence (5'->3')	Template strand	Length	Start	Stop	Tm	GC%	Self complementarity	Self 3' complementarity
Forward primer	TAGAAGGTCACCCCTAGCCTC	Plus	21	792	812	60.06	57.14	5	1
Reverse primer	ACAAGCCAAAGAGCCAGCAA	Minus	20	1166	1147	60.76	50	2	0
Product length	375
